# Supplementary material
Source: PubMed Central journal article supplement (PMC2800374)
Supplement: NIHMS157127-supplement-NOTCH-Table.pdf [file NIHMS157127-supplement-NOTCH-Table.pdf]

Table S1. List of genes in a Cancer plate for RT-PCR

| Well | Target  | Well | Target | Well | Target    | Well | Target   | Well | Target   | Well | Target | Well | Target  | Well | Target  |
|------|---------|------|--------|------|-----------|------|----------|------|----------|------|--------|------|---------|------|---------|
| A01  | IgM     | C01  | Il21   | E01  | Ifng      | G01  | Tnfrsf1b | I01  | Ifnar1   | K01  | Cd19   | M01  | Ccnb2   | O01  | Ccl3    |
| A02  | Hoxd11  | C02  | Wnt5a  | E02  | Tro       | G02  | Eed      | I02  | Map2k1   | K02  | Ebf1   | M02  | Dkk3    | O02  | Spib    |
| A03  | IgG3    | C03  | Il18   | E03  | Il1b      | G03  | Tnfrsf1a | I03  | Ifna1    | K03  | Cd8a   | M03  | Stat5b  | O03  | Cbl     |
| A04  | Hoxd10  | C04  | Wnt4   | E04  | Ptgs2     | G04  | Bmi1     | I04  | Smad1    | K04  | Dlx6   | M04  | Dkk2    | O04  | Nfkb2   |
| A05  | IgG2c   | C05  | Il10   | E05  | Tnfsf13   | G05  | Tnf      | I05  | Ifi202a  | K05  | Cd4    | M05  | Stat5a  | O05  | C2ta    |
| A06  | Hoxd1   | C06  | Wnt3a  | E06  | Nos3      | G06  | Notch1   | I06  | Six3     | K06  | Dlx3   | M06  | Dkk2    | O06  | Mbd1    |
| A07  | IgG2bs  | C07  | Il6st  | E07  | Tnfrsf13c | G07  | Tnfsf5   | I07  | Fcer2a   | K07  | Cd44   | M07  | Stat3   | O07  | Cxcl9   |
| A08  | Hoxc13  | C08  | Wnt3   | E08  | Nos2      | G08  | Dll3     | I08  | Sfpi1    | K08  | Chx10  | M08  | Dkk1    | O08  | Bapx1   |
| A09  | IgG2bm  | C09  | Il4ra  | E09  | Tnfrsf13b | G09  | Socs3    | I09  | Cr2      | K09  | Fcgr2b | M09  | Stat2   | O09  | Icam1   |
| A10  | Hoxa9   | C10  | Wnt2   | E10  | Ndnf2     | G10  | Dll1     | I10  | Runx2    | K10  | Cdx4   | M10  | Fzd6    | O10  | Fancg   |
| A11  | IgG2a   | C11  | Il1r2  | E11  | Tgfb2     | G11  | Socs2    | I11  | B2m      | K11  | Zap70  | M11  | Stat1   | O11  | Cxcl13  |
| A12  | Hoxa7   | C12  | Wnt1   | E12  | Mmp13     | G12  | Dll4     | I12  | Runx1    | K12  | Dnmt3b | M12  | Fzd1    | O12  | Fance   |
| A13  | IgG1s   | C13  | Il1r1  | E13  | Irf6      | G13  | Socs1    | I13  | Tnfrsf17 | K13  | Syk    | M13  | Prdm1   | O13  | Tyrobp  |
| A14  | Hoxa4   | C14  | Hoxd13 | E14  | Mfng      | G14  | Jag2     | I14  | Lhx8     | K14  | Dnmt3a | M14  | Fyn     | O14  | Wrm     |
| A15  | IgG1m   | C15  | Il2    | E15  | Irf4      | G15  | Cd79b    | I15  | Cd9      | K15  | Stat6  | M15  | Ptpre   | O15  | Hprt1   |
| A16  | Hoxa13  | C16  | Notch4 | E16  | Lfng      | G16  | Jag1     | I16  | Lef1     | K16  | Dnmt1  | M16  | Zfpn1a1 | O16  | Runx3   |
| A17  | IgE     | C17  | Il15   | E17  | Irf2      | G17  | Cd79a    | I17  | Cd86     | K17  | Stat4  | M17  | Cxcr4   | O17  | 18SrRNA |
| A18  | Hoxa11  | C18  | Pax5   | E18  | Igsf4a    | G18  | Foxp1    | I18  | Icsbp1   | K18  | Dicer1 | M18  | Vax2    | O18  | Rag2    |
| A19  | IgA     | C19  | Il6    | E19  | Irf1      | G19  | Vpreb1   | I19  | Cd83     | K19  | Fasl   | M19  | Cxcl12  | O19  | Gapd    |
| A20  | Hoxa1   | C20  | Notch3 | E20  | Id3       | G20  | Foxa2    | I20  | Hey1     | K20  | Cntn1  | M20  | Tlx1    | O20  | Rag1    |
| A21  | Ly6a    | C21  | Il4    | E21  | Tnfsf13b  | G21  | Vpreb2   | I21  | Cd80     | K21  | Fas    | M21  | CCr7    | O21  | Lrmp    |
| A22  | Hlxb9   | C22  | Notch2 | E22  | Id2       | G22  | Tlx3     | I22  | Hesx1    | K22  | Bcl11a | M22  | Tcf2    | O22  | Ptch1   |
| A23  | Il21r   | C23  | Il2ra  | E23  | Tnfrsf5   | G23  | Ifnb1    | I23  | Cd38     | K23  | Cd28   | M23  | Ccr2    | O23  | Lmo2    |
| A24  | Wnt5b   | C24  | Ltb    | E24  | Hdac1     | G24  | Rfng     | I24  | Hes6     | K24  | Dkk4   | M24  | Pou2f2  | O24  | Psen2   |
| B01  | Wt1     | D01  | Nfatc1 | F01  | Gsk3b     | H01  | Cdkn2a   | J01  | Btg3     | L01  | Traf2  | N01  | Cebpb   | P01  | Prked   |
| B02  | Zfpn1a3 | D02  | Hdac2  | F02  | Lig4      | H02  | Pml      | J02  | Gli1     | L02  | Lyn    | N02  | Flt4    | P02  | Blk     |
| B03  | Tsg101  | D03  | Nbn    | F03  | Gadd45b   | H03  | Cdkn1c   | J03  | Brca1    | L03  | Traf1  | N03  | Casp8   | P03  | Numb    |
| B04  | Zfpn1a2 | D04  | Gata1  | F04  | Brca2     | H04  | Mxi1     | J04  | Gfi1     | L04  | Lck    | N04  | Flt3    | P04  | Alk     |
| B05  | Trp53   | D05  | Myc    | F05  | Fosb      | H05  | Cdkn1b   | J05  | Bin1     | L05  | Spn    | N05  | Casp2   | P05  | Nfkbia  |
| B06  | Zfmx1b  | D06  | Bcl3   | F06  | Blm       | H06  | Mecp2    | J06  | Ezh2     | L06  | Jak1   | N06  | Dvl3    | P06  | Adam17  |
| B07  | Tgfb1   | D07  | Myb    | F07  | Fos       | H07  | Cdkn1a   | J07  | Bcl9     | L07  | Psen1  | N07  | Birc3   | P07  | Lmo1    |
| B08  | Yy1     | D08  | G22p1  | F08  | Zfp36     | H08  | Max      | J08  | Ezh1     | L08  | Itgax  | N08  | Dvl2    | P08  | Stk36   |
| B09  | Rel     | D09  | Mdm2   | F09  | Fgr       | H09  | Cdk6     | J09  | Atr      | L09  | Prkdc  | N09  | Biklk   | P09  | Kit     |
| B10  | Tcf1    | D10  | Xrcc5  | F10  | Xbp1      | H10  | Mafb     | J10  | Tyk2     | L10  | Igam   | N10  | Dvl1    | P10  | S100a9  |
| B11  | Rb1     | D11  | Mapk3  | F11  | Fgf8      | H11  | Cdk4     | J11  | Atm      | L11  | Pik3cg | N11  | Bcl6    | P11  | Hhex    |
| B12  | Sox4    | D12  | Xrcc4  | F12  | Tert      | H12  | Hmgb3    | J12  | Smo      | L12  | Itgai  | N12  | Dtx2    | P12  | S100a8  |
| B13  | Rad51   | D13  | Mafk   | F13  | Fgf4      | H13  | Cdk2     | J13  | Apc      | L13  | Nfkb1  | N13  | Bcl2l1  | P13  | Gli2    |
| B14  | Psx1    | D14  | Xrcc3  | F14  | Tep1      | H14  | Hmgb2    | J14  | Smad7    | L14  | Ikbkg  | N14  | Dtx1    | P14  | Ring1   |
| B15  | Rad50   | D15  | Maf    | F15  | Fanca     | H15  | Cdc20    | J15  | Akt1     | L15  | Malt1  | N15  | Bcl2    | P15  | Fgfr1   |
| B16  | Rarg    | D16  | Xrcc2  | F16  | Tal1      | H16  | Hmgb1    | J16  | Pik3cd   | L16  | Ikbkb  | N16  | Cxcr6   | P16  | Recql   |
| B17  | Pten    | D17  | Junb   | F17  | Fts       | H17  | Cend3    | J17  | Abl1     | L17  | Mageh1 | N17  | Bax     | P17  | Bcl11b  |
| B18  | Pou2af1 | D18  | Ung    | F18  | Suz12     | H18  | Hes3     | J18  | Pdgfrb   | L18  | Igf1r  | N18  | Csnk1a1 | P18  | Ptgs1   |
| B19  | Plagl1  | D19  | Igf2   | F19  | Ctcf      | H19  | Cend2    | J19  | Traf5    | L19  | Jak2   | N19  | Bad     | P19  | Zbtb7   |
| B20  | Zzank1  | D20  | Rad54l | F20  | Snrpn     | H20  | Hes2     | J20  | Ncstn    | L20  | Hes7   | N20  | Btk     | P20  | Ptch2   |
| B21  | Nras    | D21  | Hdac3  | F21  | Chek1     | H21  | Cend1    | J21  | Traf4    | L21  | Hells  | N21  | Shh     | P21  | Tcl1    |
| B22  | Meis1   | D22  | Rad52  | F22  | Snai1     | H22  | Hes1     | J22  | Mib1     | L22  | Gnas   | N22  | Cbx5    | P22  | Ppp2r1a |
| B23  | Nmyc1   | D23  | H2afx  | F23  | Cdkn2c    | H23  | Ccnb1    | J23  | Traf3    | L23  | Fgfr3  | N23  | Rasgrf1 | P23  | Suv39h1 |
| B24  | Mad     | D24  | Mll    | F24  | Set       | H24  | Gli3     | J24  | Maml1    | L24  | Frat1  | N24  | Blr1    | P24  | Nfkbib  |
