# Supplementary material
Source: PubMed Central journal article supplement (PMC2800374)
Supplement: NIHMS157127-supplement-Table_S2.pdf [file NIHMS157127-supplement-Table_S2.pdf]

data supplements

**TableS2. Differentially expressed genes included in each of the ten k-means clusters.**

| Cluster | NAME         | CBL         | MZL         | PCT        | p-value    |
|---------|--------------|-------------|-------------|------------|------------|
| 1       | Hoxd11       | 5.48536345  | 6.05323065  | 2.5419608  | 0.006502   |
| 1       | Hlxb9        | 6.4175625   | 4.4289665   | 2.5701426  | 0.0241     |
| 1       | Il10         | 4.85293685  | 4.46018505  | 1.9343466  | 0.001386   |
| 1       | Rad52        | 3.93094725  | 3.51427665  | 1.3997398  | 0.03776    |
| 1       | Ifng         | 4.95982835  | 4.12689375  | -0.2231328 | 4.069E-07  |
| 1       | Nos2         | 5.0332737   | 3.9542353   | 0.7853162  | 0.0003189  |
| 1       | Irf1         | 5.2527784   | 4.896387    | -0.3339774 | 1.556E-09  |
| 1       | Hells        | 4.3545298   | 4.7655388   | 0.7707286  | 1.129E-06  |
| 1       | <b>Dvl2</b>  | 4.2590999   | 2.7774085   | 2.6507136  | 0.07613    |
| 1       | Ccl3         | 4.4973883   | 3.7919831   | 0.6828598  | 0.00002097 |
| 1       | Cxcl9        | 5.9773802   | 5.1599964   | 0.4359844  | 0.00005598 |
| 1       | Ptch2        | 5.54818055  | 3.68535195  | 1.4392312  | 0.002541   |
| 1       | Tcl1         | 5.3034019   | 4.6712055   | 0.60962    | 0.008336   |
| 2       | Hoxc13       | 0.9339892   | 0.4353324   | 2.2331632  | 0.003454   |
| 2       | IgG2bm       | -0.7641003  | -0.3832887  | 2.3739466  | 0.02631    |
| 2       | Hoxa11       | 0.4911512   | 0.3784624   | 1.5806672  | 0.04359    |
| 2       | Pou2af1      | -0.24216745 | 0.34171815  | 2.7984852  | 0.00005523 |
| 2       | <b>Myc</b>   | 0.79172185  | 0.86485185  | 4.6317804  | 1.976E-07  |
| 2       | Irf6         | 0.05884305  | -1.38968475 | 3.0534492  | 0.0001895  |
| 2       | Irf4         | -1.17562515 | -1.52861435 | 3.7533548  | 1.129E-06  |
| 2       | Tnfsf13b     | 1.2736685   | 0.5963279   | 1.5275376  | 0.03476    |
| 2       | Gadd45b      | 1.1242079   | 1.3846001   | 3.42749    | 0.0008154  |
| 2       | Fosb         | -0.09222635 | -0.23059055 | 1.9060276  | 0.005866   |
| 2       | Xbp1         | -0.07782105 | -0.61992605 | 4.1349766  | 9.874E-08  |
| 2       | Fanca        | 0.1368664   | 0.0143178   | 1.6511434  | 0.01662    |
| 2       | Bmi1         | 0.1299577   | -0.9649441  | 2.2970456  | 0.02722    |
| 2       | Socs2        | 0.047037    | -0.0653982  | 2.087813   | 0.01156    |
| 2       | <b>Rfng</b>  | -0.3671242  | -0.2121674  | 1.176299   | 0.002006   |
| 2       | Mxi1         | -0.15948155 | -0.44567975 | 4.1223062  | 3.645E-06  |
| 2       | <b>Hes3</b>  | 1.12555045  | 0.23809145  | 4.3411424  | 0.001121   |
| 2       | Ccnd2        | 0.42423095  | 0.41031975  | 2.8554364  | 0.00007254 |
| 2       | Btg3         | 0.77477325  | 0.65525045  | 2.1252912  | 0.002172   |
| 2       | Akt1         | 0.33617845  | -0.15243475 | 0.802117   | 0.0953     |
| 2       | <b>Ncstn</b> | 0.1736864   | -0.1512246  | 0.9137512  | 0.02674    |
| 2       | <b>Mib1</b>  | 0.02271885  | 0.04413505  | 2.0919544  | 0.00002332 |
| 2       | Traf3        | -0.8275665  | -0.3976809  | 1.9876548  | 0.00001151 |
| 2       | Chx10        | 0.8838227   | 0.7711339   | 1.884678   | 0.06322    |
| 2       | Pik3cg       | -0.9408994  | -1.1395106  | 2.4571022  | 5.857E-06  |
| 2       | Stat5a       | 0.2875113   | -0.1872083  | 0.791862   | 0.05165    |
| 2       | Fzd6         | -0.04709205 | -0.46078885 | 1.8030764  | 0.08339    |
| 2       | Prdm1        | 0.1871619   | -0.5478417  | 2.628476   | 0.001385   |
| 2       | <b>Dtx2</b>  | 0.2141672   | 0.5136006   | 1.2474958  | 0.02822    |
| 2       | Mbd1         | 0.49785725  | 0.50330365  | 1.0803228  | 0.07716    |
| 2       | <b>Psen2</b> | -0.28273945 | -0.58458025 | 3.2381606  | 6.582E-07  |
| 2       | Prkcd        | 0.8838227   | 0.7711339   | 1.884678   | 0.06322    |
| 3       | Zfhx1b       | -0.0439246  | -0.1635316  | -0.9263248 | 0.04624    |
| 3       | Tgfb1        | -0.24099145 | -0.28857345 | -1.5280016 | 0.004552   |
| 3       | Wnt5a        | 0.274831    | 0.5161158   | -1.5195916 | 0.04191    |

|   |              |             |             |            |           |
|---|--------------|-------------|-------------|------------|-----------|
| 3 | Il18         | -0.25764045 | 0.53412915  | -1.0929896 | 0.0203    |
| 3 | Il2          | 1.91116055  | -0.32940245 | -2.6959314 | 0.005403  |
| 3 | Ltb          | 0.2543423   | -0.3520793  | -3.195522  | 0.02191   |
| 3 | Nfatc1       | -0.4177968  | -0.7206598  | -1.733431  | 0.002879  |
| 3 | Maf          | -0.18624495 | -0.63895535 | -1.3177862 | 0.09357   |
| 3 | Tnfsf13      | 0.93132625  | -0.69403635 | -3.064629  | 0.06094   |
| 3 | <b>Lfng</b>  | 0.01626175  | -0.41992665 | -1.4824608 | 0.07031   |
| 3 | Igsf4a       | 0.46513175  | -0.70227465 | -0.826755  | 0.0151    |
| 3 | <b>Id2</b>   | 0.45907015  | -0.47490625 | -2.531996  | 0.001975  |
| 3 | Fgr          | -0.0272798  | 0.0761306   | -3.1060158 | 0.001613  |
| 3 | Tnfrsf1a     | 0.5394722   | -0.3162468  | -1.8968058 | 0.0003819 |
| 3 | Ccnd3        | -0.44724495 | -1.74341115 | -2.2980598 | 0.01742   |
| 3 | <b>Ccnd1</b> | -0.3699254  | -0.5285372  | -1.4470898 | 0.07516   |
| 3 | Cd86         | 0.7387606   | 0.4573206   | -3.3362456 | 0.000133  |
| 3 | Lck          | 0.1962567   | -0.8263779  | -1.889098  | 0.01927   |
| 3 | Nfkb1        | -0.11611335 | 0.21599545  | -1.6957852 | 0.03561   |
| 3 | Jak2         | -0.12719265 | -0.74393465 | -1.1762236 | 0.02194   |
| 3 | Fzd1         | -0.35827285 | -0.28538725 | -2.0845974 | 0.001091  |
| 3 | Bcl2         | -1.03281535 | -0.78623695 | -1.8313528 | 0.04041   |
| 3 | Cxcr6        | -0.2214528  | -0.9190034  | -2.3823094 | 0.003478  |
| 3 | Cbx5         | -0.01171605 | 0.23971195  | -0.903325  | 0.0568    |
| 3 | <b>Nfkb2</b> | 0.15740645  | -0.03714195 | -1.6572508 | 0.01051   |
| 3 | Cxcl13       | 0.1226884   | 0.7178662   | -2.2419102 | 0.07877   |
| 3 | Lrmp         | -0.2578776  | -0.5894856  | -1.9406614 | 0.04041   |
| 3 | Hhex         | 0.01813815  | 0.55332495  | -2.6078094 | 0.0002204 |
| 4 | IgA          | -7.10143005 | -6.82168305 | -0.147373  | 0.01507   |
| 4 | Tnfrsf17     | -4.35646495 | -3.52453675 | 1.8535108  | 0.002024  |
| 4 | <b>Numb</b>  | -4.38902985 | -5.41136865 | -0.83648   | 0.002135  |
| 5 | Hoxd1        | 2.1340444   | 1.5327778   | 0.5282212  | 0.02796   |
| 5 | Hoxa9        | 2.4347071   | 2.5942621   | 0.0183818  | 0.008942  |
| 5 | IgE          | 3.5554553   | 2.0435929   | 1.8107666  | 0.07449   |
| 5 | Ly6a         | 2.57425085  | 2.19879125  | 3.9961862  | 0.004626  |
| 5 | Il21         | 3.39698335  | 3.45528455  | 0.4329828  | 0.02015   |
| 5 | Il6          | 2.8977931   | 2.8697001   | 0.5205772  | 0.01522   |
| 5 | Bcl3         | 3.07455465  | 2.86437805  | 0.2628002  | 0.0003955 |
| 5 | Fgf4         | 1.3661133   | 4.1429671   | 0.8160818  | 0.06769   |
| 5 | Tnf          | 2.57806     | 2.1660778   | 0.1438182  | 0.0001433 |
| 5 | Socs3        | 2.51106195  | 2.41468135  | 0.7823294  | 0.01412   |
| 5 | Vpreb1       | 2.10637155  | 2.40636215  | 0.1645174  | 0.01472   |
| 5 | Vpreb2       | 2.1233458   | 1.933521    | 0.4430794  | 0.06028   |
| 5 | Cdk4         | 2.7861122   | 3.35135     | 1.4549864  | 0.001363  |
| 5 | Hmgb2        | 1.9155241   | 1.7183709   | 0.3431506  | 0.02205   |
| 5 | Ifna1        | 1.3717593   | 2.1503863   | 2.000783   | 0.05375   |
| 5 | <b>B2m</b>   | 1.7650918   | 1.5802112   | 0.806119   | 0.04668   |
| 5 | Gfi1         | 3.1703859   | 2.8691555   | 0.7138912  | 0.01447   |
| 5 | Cebpb        | 2.37698085  | 2.20845365  | 1.3943316  | 0.0377    |
| 5 | Rasgrf1      | 4.0680825   | 2.0878995   | 1.0433388  | 0.09873   |
| 5 | C2ta         | 2.9993351   | 2.0595561   | 2.8731318  | 0.08273   |
| 5 | Rag2         | 3.8377183   | 2.6506933   | 1.2793198  | 0.001176  |
| 6 | <b>Hoxa7</b> | 1.80024825  | 2.31807965  | -2.1963912 | 0.002053  |
| 6 | Hoxa1        | 2.26879255  | 3.08738115  | -2.3958036 | 0.0002452 |
| 6 | Wnt1         | 2.99807905  | 3.25152765  | -0.6085458 | 0.057     |

|   |               |             |             |            |           |
|---|---------------|-------------|-------------|------------|-----------|
| 6 | Il1b          | 3.35037295  | 3.11277435  | -0.9517902 | 0.0002473 |
| 6 | Ptgs2         | 3.91638795  | 2.86240035  | -0.8741146 | 0.001344  |
| 6 | Id3           | 2.8094228   | 2.6534016   | -1.142586  | 0.0001037 |
| 6 | Socs1         | 2.98383655  | 2.34786115  | -0.6598908 | 1.222E-06 |
| 6 | Ifnb1         | 2.78834625  | 2.60704165  | -1.0069996 | 0.01503   |
| 6 | Six3          | 3.32542775  | 1.94575615  | -1.1707306 | 0.04498   |
| 6 | Cdx4          | 2.3236221   | 1.7936139   | -2.3954786 | 0.005182  |
| 6 | Lmo2          | 3.957649    | 3.7716234   | -1.8492074 | 5.713E-06 |
| 6 | S100a8        | 4.02596165  | 2.62762085  | -3.1418272 | 0.002224  |
| 7 | Rb1           | -0.99856845 | -2.32374205 | 0.969996   | 0.0004577 |
| 7 | Rarg          | -0.9896513  | -2.1413347  | -0.7222852 | 0.005693  |
| 7 | Pten          | -0.8466606  | -1.2091432  | 0.0785908  | 0.003281  |
| 7 | Wnt4          | -2.9454622  | -2.7075852  | 0.2791556  | 0.0508    |
| 7 | Il6st         | -1.380591   | -1.2117182  | 0.9085584  | 0.0001104 |
| 7 | <b>Notch4</b> | -0.89922495 | -0.12950515 | 0.3587474  | 0.0359    |
| 7 | <b>Notch3</b> | -1.5756364  | -1.313375   | -0.4456622 | 0.08244   |
| 7 | Xrcc3         | -1.1436185  | -0.8204735  | 1.3678438  | 0.0004456 |
| 7 | Gsk3b         | -0.7270276  | -0.78102    | -0.1045336 | 0.04337   |
| 7 | Zfp36         | -0.61812655 | -1.32580195 | 1.2969386  | 2.583E-06 |
| 7 | Tert          | -0.95849285 | -0.16596605 | 0.4627904  | 0.06977   |
| 7 | Tep1          | -1.0137165  | -1.8701665  | -0.987819  | 0.003729  |
| 7 | Pml           | -0.96070965 | -0.69337305 | -0.1168054 | 0.05843   |
| 7 | Cdkn1c        | -2.06660595 | -0.90159175 | 0.9168436  | 0.004449  |
| 7 | Max           | -0.3940799  | -0.4189109  | 0.6133168  | 0.03153   |
| 7 | Apc           | -1.1593524  | -0.9062108  | 0.5383054  | 0.00322   |
| 7 | Traf4         | -1.1784996  | -1.4069022  | 0.2552124  | 0.08112   |
| 7 | Stat6         | -1.25080095 | -1.56832835 | -0.9156916 | 0.01818   |
| 7 | Dicer1        | -0.97590075 | -0.51104735 | 0.3879222  | 0.005155  |
| 7 | Dkk4          | -1.99568165 | -0.93118705 | 2.2583074  | 0.01529   |
| 7 | <b>Igf1r</b>  | -0.4398453  | -1.1998625  | -0.1874828 | 0.0817    |
| 7 | <b>Dvl3</b>   | -1.1553736  | -0.9313792  | 0.2011486  | 0.003259  |
| 7 | <b>Dvl1</b>   | -0.5208056  | -0.1452468  | 0.5453832  | 0.01565   |
| 7 | Bcl6          | -2.1082866  | -2.5649356  | -1.4040596 | 0.05029   |
| 7 | Bad           | -0.653452   | -0.7030074  | 0.0980892  | 0.04939   |
| 7 | Ptch1         | -0.5259275  | -0.5990417  | 0.553181   | 0.02175   |
| 7 | Gli2          | -2.77471415 | -2.38386615 | -0.536099  | 0.007206  |
| 8 | Il21r         | 0.7823456   | 0.4342028   | -1.268503  | 0.04003   |
| 8 | Sox4          | -1.20127145 | 1.38421835  | -0.089755  | 0.0716    |
| 8 | Wnt3a         | 1.1116647   | 1.9829287   | 0.0989794  | 0.09146   |
| 8 | Il1r2         | 1.61376245  | 1.17599285  | -1.5520358 | 0.071     |
| 8 | Il15          | 1.8501637   | 0.6886689   | -1.2174988 | 0.0007813 |
| 8 | <b>Il2ra</b>  | 2.3423041   | 1.1945189   | -1.1589212 | 0.002706  |
| 8 | Nbn           | 0.6500706   | 0.4710476   | -0.2875232 | 0.05387   |
| 8 | Mapk3         | 0.22629485  | 0.34750525  | -0.6075144 | 0.07417   |
| 8 | Mafk          | 0.78276755  | 0.72247215  | -0.792769  | 0.01416   |
| 8 | H2afx         | 0.8215694   | 0.9757436   | -0.6161474 | 0.02976   |
| 8 | Tnfrsf13c     | 0.479915    | 1.690428    | -0.1125582 | 0.009974  |
| 8 | <b>Mfng</b>   | 1.3973891   | 0.4297775   | 0.4134382  | 0.07037   |
| 8 | Hdac1         | 0.70239735  | 1.00547175  | -0.4780454 | 0.002125  |
| 8 | Chek1         | 1.4158585   | 1.6024183   | 0.2974238  | 0.02817   |
| 8 | Snai1         | 0.34286385  | 0.71391485  | -0.8307238 | 0.06752   |
| 8 | Mafb          | 0.63204725  | 0.31666005  | -0.7435252 | 0.01411   |

|    |              |             |             |            |            |
|----|--------------|-------------|-------------|------------|------------|
| 8  | Cdk2         | 0.15856255  | 0.32846955  | -0.6398266 | 0.08225    |
| 8  | Ccnb1        | 1.2736051   | 1.0976887   | -0.2078662 | 0.08176    |
| 8  | Sfpi1        | 1.5568154   | 1.1365882   | -0.5417842 | 0.0006198  |
| 8  | Cd80         | 1.5647602   | 1.5976082   | -0.9200046 | 0.01525    |
| 8  | Cd38         | 1.10521005  | 0.88840085  | -1.1771166 | 0.00006097 |
| 8  | Smad7        | 0.50712165  | 0.23904265  | -1.0836988 | 0.03961    |
| 8  | Fasl         | 1.4812686   | 0.7571388   | -1.6888218 | 0.01071    |
| 8  | Fas          | 1.21667155  | 1.19863435  | -1.1277544 | 0.03707    |
| 8  | Lyn          | 0.4623285   | 0.5655743   | -1.1866576 | 0.001559   |
| 8  | Spn          | 1.7262523   | 0.3331791   | 0.8010454  | 0.01371    |
| 8  | <b>Psen1</b> | 1.3303141   | 0.8903741   | 0.0250078  | 0.03675    |
| 8  | Itgam        | 0.6030697   | 0.3716883   | -0.932719  | 0.01516    |
| 8  | Gnas         | 0.6494145   | 0.1647909   | -0.5380152 | 0.07553    |
| 8  | Ccnb2        | 1.8412814   | 1.0566476   | 0.2589306  | 0.004379   |
| 8  | Stat1        | 1.5286382   | 0.8560786   | -0.290204  | 0.003423   |
| 8  | Icam1        | 1.1242215   | 1.4368593   | -0.3884604 | 0.001111   |
| 8  | Fancg        | 0.7583034   | 0.9173778   | 0.0070254  | 0.01768    |
| 8  | Tyrobp       | 1.1390373   | 1.0405715   | -1.6226216 | 0.00005697 |
| 8  | Nfkbia       | 0.9878221   | 0.8779153   | -1.1262338 | 0.000189   |
| 8  | Lmo1         | 2.27880155  | 0.60940335  | 0.4000834  | 0.01721    |
| 8  | Nfkbib       | 0.97132565  | 1.04229085  | -0.862174  | 0.04588    |
| 9  | Hoxa4        | -1.73667165 | -0.09346885 | -3.1995008 | 0.001973   |
| 9  | Zfpn1a3      | -1.8619092  | -1.6554508  | -2.8167112 | 0.06153    |
| 9  | Rel          | -1.3648222  | -1.2296698  | -2.559244  | 0.01161    |
| 9  | Wnt2         | -2.0183063  | -1.2255593  | -4.0332118 | 0.00406    |
| 9  | Pax5         | -2.57545885 | -1.81651785 | -4.994062  | 0.01417    |
| 9  | <b>Gata1</b> | -0.64388445 | -1.32474625 | -6.1582238 | 0.0006697  |
| 9  | Mmp13        | -0.72082935 | -0.30095475 | -3.9197762 | 0.06762    |
| 9  | Tnfrsf5      | -0.78574635 | -0.07605515 | -3.0217674 | 0.001855   |
| 9  | Tal1         | 0.29194715  | -0.24959705 | -5.5101238 | 0.0006699  |
| 9  | Cd79a        | -0.53908215 | -0.49565355 | -3.4658082 | 0.003762   |
| 9  | Hmgb3        | -1.3009905  | -0.9095497  | -3.1051004 | 0.04352    |
| 9  | Icsbp1       | 0.3959857   | 0.5386517   | -4.4088322 | 0.03182    |
| 9  | Cd19         | -0.74119085 | -0.54106685 | -4.9356634 | 0.009428   |
| 9  | Bcl11a       | -1.71806295 | -1.50925255 | -3.156354  | 0.0006263  |
| 9  | Tlx1         | -0.6002306  | -1.4831968  | -5.3831128 | 0.001594   |
| 9  | Blr1         | -1.8035287  | -2.2095243  | -4.5115382 | 0.05806    |
| 9  | Spib         | 0.39237145  | 1.26006825  | -3.8398322 | 0.000302   |
| 9  | Bapx1        | -0.6671938  | -1.1024492  | -3.932143  | 0.001543   |
| 9  | S100a9       | 0.2580347   | 0.2097421   | -4.082066  | 0.0424     |
| 10 | IgG1s        | -4.0002707  | -4.3713493  | 7.925225   | 0.00002104 |
| 10 | IgG2a        | -0.1403201  | 0.7740221   | 8.8045582  | 2.282E-06  |
| 10 | <b>DI13</b>  | 2.4564327   | 2.6195079   | 11.0715142 | 5.698E-08  |
| 10 | Cd44         | 1.42893535  | 1.40723895  | 6.0962548  | 0.00002204 |

The number of each k-means cluster is shown in the left column along with the associated names of individual genes in the cluster. Numbers indicated fold change relative to normal spleen in log2 scale for each of the tumore types. P values are listed in the right column. Genes that are involved in the NTOCH signaling pathway or are NOTCH target genes are indicated in bold.
