# Supplementary material
Source: PubMed Central journal article supplement (PMC2800374)

Shin *et al.* Figure S1.

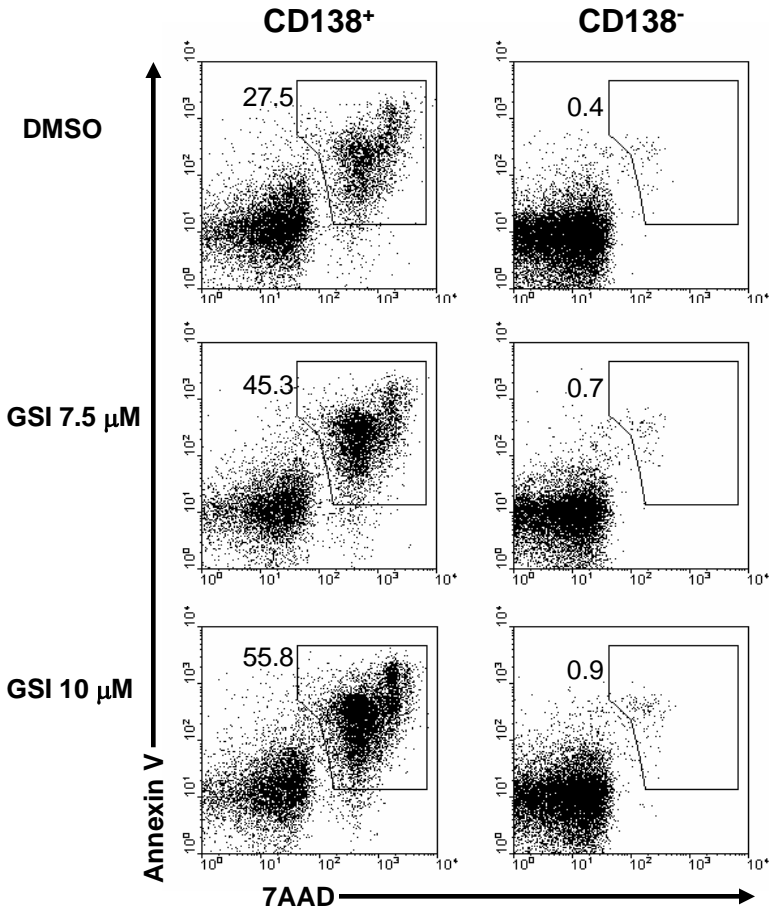

Supplement: NIHMS157127-supplement-NOTCH-Figure_1.pdf [file NIHMS157127-supplement-NOTCH-Figure_1.pdf]

Shin *et al.* Figure S2.

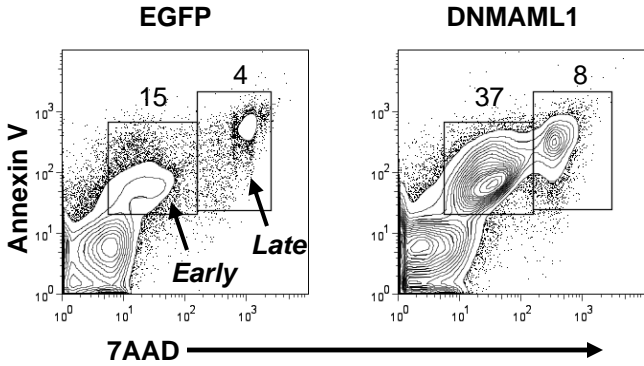

Supplement: NIHMS157127-supplement-NOTCH_Figure_2.pdf [file NIHMS157127-supplement-NOTCH_Figure_2.pdf]
